1 **Females don't always sing in response to male song, but**  
2 **when they do, they sing to males with higher pitched songs**

3

4 Alexander N. G. Kirschel<sup>1,2,3\*</sup>, Zacharo Zanti<sup>1</sup>, Zachary T. Harlow<sup>3</sup>, Edgar E.  
5 Vallejo<sup>4†</sup>, and Martin L. Cody<sup>3</sup>, and Charles E. Taylor<sup>3</sup>.

6 †Deceased 19<sup>th</sup> June 2019

7 <sup>1</sup>*Department of Biological Sciences, University of Cyprus, P.O. Box 20537, Nicosia*  
8 *1678, Cyprus*

9 <sup>2</sup>*Edward Grey Institute, Department of Zoology, University of Oxford, South Parks*  
10 *Road, Oxford OX1 3PS, United Kingdom*

11 <sup>3</sup>*Department of Ecology and Evolutionary Biology, University of California, 621*  
12 *Charles E. Young Dr. South, Los Angeles, CA 90095–1606*

13 <sup>4</sup>*Department of Information Technologies and Computer Science, ITESM-Campus*  
14 *Estado de México, Estado de México, Mexico*

15

16 \*Corresponding author: [kirschel@ucy.ac.cy](mailto:kirschel@ucy.ac.cy); Tel: +35722892660

17

18 **Abstract**

19 The long-held view that bird song is exclusively a male trait has been challenged  
20 recently by a number of studies and reviews highlighting the prevalence of female  
21 song. In spite of that, there remains a lack of knowledge on the function of female  
22 song, with most evidence thus far focusing on females performing duets with males in  
23 courtship displays, typically for joint territory defence or mate guarding purposes.

24 Here we show in a tracheophone suboscine passerine *Formicarius moniliger*, a

25 sexually monomorphic species in which both sexes sing, that females may participate  
26 in both intrasexual and intersexual territory defence. Females sing more in response to  
27 females than to males, suggesting they consider females more of a threat to their  
28 territory. Yet, females also demonstrate an unexpected pattern of singing back to  
29 playback of males singing higher frequency song than themselves. Unlike males, who  
30 respond indiscriminately to playback of any song performed by either sex, females  
31 appear to discern not only the sex, but perhaps also the size of the presumed intruder.  
32 There is a strong negative relationship between body mass and frequency, and  
33 females responding only to higher frequency male song suggests they will only  
34 engage in territory defence with males when they expect those males to be weaker  
35 than they are. While our results are consistent with expectations of a shared ancestral  
36 function of song in territory defence, they also suggest females may suffer greater  
37 costs in engaging in territorial disputes and thus limit their vocal contribution  
38 according to the perceived threat.

39 **Keywords: Animal communication, antthrush, female song, intersexual**  
40 **interactions, intrasexual territoriality, Neotropical birds, playback experiment,**  
41 **sexually monomorphic, sex roles, suboscine passerine.**

42 Sexual dimorphism is manifested in animals in a variety of ways resulting from  
43 different selective pressures on the sexes. Many elaborate traits have evolved,  
44 especially in males, with the aim of attracting females and fighting off rival males  
45 (Lande, 1980). Such dimorphism is consistent with conventional sex roles of males  
46 competing for mates and females investing in parental care (Kokko & Jennions,  
47 2008). Yet many species are sexually monomorphic, with no differences in body size,  
48 colour or pattern. Sexual dimorphism may be constrained by genetic correlations or  
49 strong stabilizing selection acting on the sexes (Merilä et al., 1998) (Price & Grant,

50 1985), which could be driven by them occupying similar niches (Székely et al., 2007)  
51 or possibly biparental care (Badyaev, 1997). Many sexually monomorphic animals  
52 use acoustic signals for mate attraction and territory defence, and the traditional view  
53 has been that song is a sexually divergent behaviour performed by males, especially  
54 in temperate regions, but that view is now changing (Odom et al., 2014).

55         There is a growing number of studies on animals in which both sexes sing. It  
56 has long been known that in tropical birds, many females sing as well as males (Slater  
57 & Mann, 2004). Females in these instances may at times sing loosely in association  
58 with the male or at others sing a tightly-coordinated duet (Slater & Mann, 2004), the  
59 latter a phenomenon which has received much attention in the literature (Hall, 2004;  
60 Langmore, 1998; Slater & Mann, 2004). Female song in the tropics was previously  
61 considered a derived state attributed to sex role convergence in locations where birds  
62 are resident and defend territories year-round (Slater & Mann, 2004). However the  
63 view that it has resulted from a process of convergence in sex roles has been  
64 challenged by studies demonstrating female song is ancestral in songbirds (Odom et  
65 al., 2014; Riebel et al., 2019). Female song is indeed correlated with life history  
66 characteristics that favour female competition as found in many socially monogamous  
67 sedentary tropical birds (Price, 2009). It has been lost in clades that evolved  
68 differences in life history traits such as migratory behaviour and mating systems as  
69 the ranges of species in those clades shifted into temperate regions (Price et al., 2009).  
70 So while songs may represent ornaments attractive to the opposite sex, except in a  
71 few cases of sex-role reversal (e.g. Geberzahn et al., 2010; Goymann et al., 2004),  
72 their primary function in females is thought to be in intrasexual competition in species  
73 defending territories year-round from same-sex rivals (Tobias et al., 2011; Tobias et  
74 al., 2012b).

75           Such year-round territoriality is particularly evident in insectivorous birds  
76 (Hau et al., 2000; Slater & Mann, 2004; Tobias et al., 2011), with much previous  
77 work on duetting in birds focusing on insectivorous wrens and antbirds (Fedy &  
78 Stutchbury, 2005; Levin, 1985; Seddon & Tobias, 2006). Female song is also  
79 common in many Australian passerines, including in the insectivorous fairy-wrens,  
80 whistlers, shrike-thrushes, and bell birds, which like the wrens and antbirds, have  
81 extended longevity when compared to most temperate passerines, and defend  
82 territories year-round. In these taxa, the sexes are either sexually dimorphic or  
83 dichromatic (e.g. antbirds (Kirschel et al., 2019; Tobias & Seddon, 2009) and fairy-  
84 wrens and whistlers (Hall & Peters, 2008; van Dongen & Mulder, 2008)), sing  
85 distinctly different songs (e.g., wrens (Mennill & Vehrencamp, 2008)), or both (again  
86 antbirds (Tobias & Seddon, 2009), and fairy-wrens (Hall & Peters, 2008)), suggesting  
87 songs may still serve different functions among the sexes. Might there be situations in  
88 species where the sexes are monomorphic and sing indistinguishable songs, and what  
89 might such cases reveal regarding sex roles? Perhaps sexually monomorphic  
90 vocalisations could play a role in intersexual social competition (Tobias et al., 2012b).  
91 Here we examine such a case. We studied a population of sexually monomorphic  
92 Mexican antthrush – a.k.a. Mayan antthrush (Krabbe & Schulenberg, 2020) –  
93 (*Formicarius moniliger*), for which previous studies have shown both sexes sing  
94 (Kirschel et al., 2011; Kirschel et al., 2009b).

95           Suboscine passerines lack the vocal-control areas in the forebrain associated  
96 with song learning (Gahr, 2000) but exhibit some of the most elaborate mechanisms  
97 of sound production in their courtship displays, including wing stridulation in club-  
98 winged manakins (Bostwick & Prum, 2005) and aeroelastic flutter in *Smithornis*  
99 broadbills (Clark et al., 2016). Mexican antthrush is a tracheophone suboscine (Tobias

100 et al., 2012a), however, a group whose simple stereotypic songs have allowed  
101 investigators to identify songs to species (Trifa et al., 2008), and to track movements  
102 of individuals in space and time using an acoustic sensor network (Collier et al.,  
103 2010). Previous work on Mexican antthrush has shown how songs can reliably be  
104 assigned to individuals (Kirschel et al., 2009a), and using such song classifications,  
105 resulting territory maps have demonstrated little territory overlap between same sex  
106 rivals suggesting strong intrasexual territoriality (Kirschel et al., 2011). However,  
107 previous studies have not distinguished male from female song (Kirschel et al., 2011)  
108 in a species which also lacks any sexual dimorphism in either plumage or body size  
109 (Krabbe & Schulenberg, 2020).

110 We nevertheless expected Mexican antthrushes could distinguish between the  
111 songs of each sex, and investigated how males and females respond to song produced  
112 by possible territory intruders of the same or opposite sex using playback  
113 experiments. We hypothesized that a vocal response to same sex playback represented  
114 territory defence, though could also represent mate guarding. Conversely, a vocal  
115 response to opposite sex playback could represent intersexual territory defence, but  
116 potentially also promiscuous intentions. Our overall aim was to determine when each  
117 sex used songs in response to possible intruders, thus informing us of the function of  
118 female song, which remains understudied across birds (Odom & Benedict, 2018;  
119 Riebel et al., 2019). Moreover, because of much evidence of a negative correlation  
120 between body mass and song frequency in birds (in centre frequency – (Wallschläger,  
121 1980); and peak frequency (Ryan & Brenowitz, 1985), (but see (Geberzahn et al.,  
122 2009) we also tested whether such a relationship exists within antthrushes. If there is  
123 such a relationship, might individuals perceive differences in body mass? If larger  
124 birds sang lower frequency song, responses might differ based on the size of the

125 presumed intruder. We tested this hypothesis by comparing responses to differences  
126 in frequency between responder's song and playback stimulus, as well as differences  
127 in body mass between responder and presumed intruder.

128

## 129 **Methods**

### 130 *Fieldwork*

131 Fieldwork took place at the Estación Chajul in the Montes Azules Biosphere Reserve,  
132 in south-eastern Chiapas, Mexico (16°6'44''N; 90°56'27''W), during 8-17 June 2007,  
133 7-18 December 2008, 7-28 May 2009, and 11-31 May 2012. Montes Azules, also  
134 known as Selva Lacandona, represents the largest expanse of pure tropical rainforest  
135 in North America (ParksWatch, 2003). The study was focused within a 50-ha study  
136 plot at an elevation range of 150-165 m, on the northern side of the Lacantún River  
137 (Kirschel et al., 2011). Mexican antthrush is a sedentary species (Krabbe &  
138 Schulenberg, 2020) that according to previous work defends a ~ 2ha territory year  
139 round, with both sexes participating in territory defence by singing, but do not  
140 coordinate their songs into duets (Kirschel et al., 2011). They are socially  
141 monogamous, and both sexes incubate eggs and provide parental care (corresponding  
142 author pers. obs.). Breeding has been recorded between April and June (Krabbe &  
143 Schulenberg, 2020), and our experience based on nest discoveries confirmed they  
144 were breeding in May upon the onset of the rainy season, but not in December.

145 We captured birds using target netting techniques and marked captured birds  
146 with a unique combination of colour rings to aid visual confirmation of their identity.  
147 We deployed individual mist nets (Avinet or Ecotone, 30- or 36-mm mesh, 12 x 2.5  
148 m) along 1 - 2 m-wide trails, with the bottom of each net set at ground level. We  
149 target netted antthrushes using conspecific playback. Captured birds were also

150 weighed and measured and 50-100 $\mu$ L of blood was obtained via venepuncture of the  
151 brachial vein for genetic sex identification. Individuals caught in 2012 also had a  
152 radio-frequency identification (RFID) tag fitted on their backs with a harness as part  
153 of a parallel study, and methods used are described therein (Corresponding author et  
154 al. unpublished ms).

155 We recorded ringed birds singing along trails in the study area in accordance  
156 with methods used in previous studies (Kirschel et al., 2011; Kirschel et al., 2009b).  
157 Specifically, we used a Marantz PMD 670 / 661 recorder at a sampling rate of 44  
158 100/48 000 Hz and a 16-bit amplitude resolution, with Sennheiser microphones ME-  
159 67/K6, MKH20 microphone with a Telinga parabolic reflector, or MKH8050 housed  
160 in a Rycote windshield, as well as a VoxNet wireless acoustic sensor network  
161 recording at 48 000 16 bit samples per second (see (Collier et al., 2010; Kirschel et  
162 al., 2011)).

163

#### 164 *Ethical note*

165 We minimised adverse impacts on the birds in procedures used, including keeping  
166 handling time to a minimum, ensuring bleeding had stopped after blood samples were  
167 taken, and returning birds for release back into their territories. In May 2012, we fitted  
168 20 birds (11 males, 9 females) with RFID tags from BioTrack Ltd. (Dorset, UK;  
169 model PIP3) using a 1-mm-diameter elastic thread harness. We ensured the tag and  
170 harness were < 5% of body weight of all the birds involved, in accordance with  
171 recommendations (Fair et al., 2010). Anthrushes are sedentary, ground dwelling  
172 birds, and such loggers are likely less of a burden than for birds that migrate or forage  
173 above ground. The harness was designed to fall off after about a month, so that the  
174 bird carried the tag no longer than needed for the experiments. Fieldwork performed

175 in June 2007, December 2008 and May 2009 was performed under UCLA's Animal  
176 Research Committee protocol. Fieldwork in May 2012 was performed under a ringing  
177 licence from the Game and Fauna Service of the Republic of Cyprus. Fieldwork in  
178 Mexico were performed under SEMARNAT permit no. FAUT-0192.

179

### 180 *Playback experiments*

181 Forty-one playback stimuli were prepared using Raven Pro 1.4 (Cornell Lab of  
182 Ornithology) using songs recorded in previous studies (Kirschel et al., 2011; Kirschel  
183 et al., 2009b) from 2007 to 2009, and further recordings obtained during fieldwork in  
184 2012. The songs used belonged to 24 ringed individuals and had been recorded while  
185 colour-ring combinations were confirmed, or were classified unambiguously as  
186 belonging to specific individuals during previous work (Kirschel et al., 2011; Kirschel  
187 et al., 2009b). Sex of individuals whose songs were used in experiments had been  
188 previously identified genetically (Kirschel et al., 2011; Kirschel et al., 2009b), or had  
189 been predicted based on behaviour typical of one of the sexes during the May 2012  
190 field season and subsequently confirmed genetically (see below). Each stimulus was  
191 prepared with songs that were high-pass filtered at 400 Hz to remove background  
192 noise, maximum amplitude normalized at 20 000 units (Raven's amplitude unit), and  
193 arranged temporally with two songs of an individual within a stimulus with the  
194 remainder silence (approx. 22 s between songs) and then looped continuously for the  
195 duration of the experiment (see Table 1 for mean frequency and standard deviation  
196 values for male and female playback stimuli). Playback apparatus consisted of an  
197 Apple iPod MP3 player and a TivoliAudio PAL loudspeaker, with output volume set  
198 at the same level for all experiments. Playbacks were performed in December 2018,  
199 May 2009 and May 2012 in three sessions across the day and stimuli were randomly



200 selected, except for the experiment subset in May 2012 (see below) and avoidance of  
201 neighbour song to minimise presentation of familiar stimuli (Lovell & Lein, 2004).  
202 Experiments were performed across the following times: during the morning session  
203 (0630 – 0841 hours), middle session (0914 – 1400 hours) and afternoon session (1523  
204 – 1930 hours) within territory boundaries identified in the field (Kirschel et al. 2011).

205 Experiments varied in length and depended on an approach by focal  
206 individuals. Antthrushes are inconspicuous, terrestrial birds (Cody, 2000), which may  
207 approach gradually and silently on the ground, possibly from far within their territory.  
208 In such cases it could take them 10 - 20 min, occasionally even longer, to approach to  
209 within a distance of the loudspeaker where a recording of suitable quality might be  
210 obtained. Recordings were thus obtained opportunistically when birds started  
211 vocalizing in response to the playback and only those experiments where recordings  
212 were obtained are included in analyses – except for a subset of experiments performed  
213 in May 2012 (see below). Our aim was to document who sang and what sex they  
214 were, in response to which individual playback and the sex, song characters, and body  
215 mass of the individual whose song was used in the experiment.

216 In experiments on pairs whose location was not known, if we had no response  
217 we dropped the experiment because we had no way of knowing if the pair were within  
218 range (c.f. (de Kort & ten Cate, 2001; Kirschel et al., 2009a). For some experiments,  
219 especially in field seasons prior to 2012, we may not have ringed both individuals of a  
220 focal pair. In such cases we still use the data of the experiment from the one identified  
221 individual but do not consider any partner's response in analyses.

222

223 *May 2012 standardised experiments*

224 A parallel telemetry study performed in May 2012 focused on approaches to specific  
225 stimuli (Corresponding author et al. unpublished ms). This set of experiments was  
226 arranged with a standardised playback duration of 20 min, and a balanced design of  
227 two male and two female playback experiments per territory. Playback experiments  
228 alternated in order per territory between Male-Female-Male-Female and Female-  
229 Male-Female-Male with one experiment in the morning session (from 0810 – 0830  
230 hours), two in the middle session (from 1110 - 1130 hours and 1340 – 1400 hours)  
231 and one in the afternoon session (from 1740 – 1800 hours). We waited at least 24  
232 hours before performing the next experiment in any territory. We set the duration to  
233 20 min because using telemetry we could determine the locations of both members of  
234 the pair before the initiation of playback. Because these experiments had a cut-off  
235 time, we also kept track of experiments where neither individual of a pair responded  
236 with song within that time and included them in our analyses.

237

### 238 *Genetic sex identification*

239 DNA was extracted from blood or feather samples collected from 21 individuals in  
240 the field in 2012 using a QIAGEN DNEasy Blood and Tissue Kit (QIAGEN,  
241 Valencia, CA) following manufacturer's protocols. Highly conserved primers (2550F  
242 and 2718R, (Fridolfsson & Ellegren, 1999)) were used in polymerase chain reaction  
243 (PCR) to amplify the differently sized introns of Z- and W- linked chromohelicase-  
244 DNA binding protein 1 (CHD1) genes. PCR products were separated in a 1 or 2%  
245 agarose gel run in TAE buffer, revealing one or two bands for males and females  
246 respectively.

247

### 248 *Song feature extraction*

249 Song features needed to be extracted from recordings for use in analyses. These  
250 included the peak frequency measurements needed to determine if song frequency  
251 affects response levels. Also, to identify the singer on recordings obtained in 2012, we  
252 needed to extract song features from recordings and then classify songs to individual  
253 in a canonical discriminant analysis, as had been done with recordings from previous  
254 years (Kirschel et al., 2011). We thus imported 83 recordings from fieldwork  
255 performed in May 2012 into RAVEN Pro 1.4 (Cornell Lab of Ornithology, Ithaca,  
256 NY, USA) where song sequences were cut into separate WAV files, which were then  
257 processed in a feature extraction program in MATLAB 7 (MathWorks 2005). The  
258 procedure has been described in detail previously (Kirschel et al., 2009b). Here, we  
259 follow the approach used in a previous study (Kirschel et al., 2011), extracting 19  
260 temporal and spectral features of song: Temporal features extracted were (1) inter-  
261 onset-interval of the first note to the second note; (2) duration from the start of the  
262 second note to the end of the last note; (3) rate of the main trill part of the song; (4)  
263 rate of the first half of the trill; (5) rate of the second half of the trill (see Kirschel et  
264 al. 2009a) for an explanation of rate calculations used), and (6) number of notes. We  
265 extracted the following spectral measures: the peak frequency of the first five, last  
266 four, and the middle note of the trill; the highest and lowest frequency notes; and the  
267 peak frequency of the whole trill.

268

### 269 *Differentiation of multiple individuals singing on a single recording*

270 Where two or more singing individuals were recorded on any recording, we separated  
271 out the songs to each individual first based on any instructions provided by the  
272 recordist (e.g. announcements of bird east of trail, west of trail following each song),  
273 and/or any obvious differences between songs observed from spectrograms which

274 allowed for clear separation of which songs were sung by each bird. In such a case,  
275 the threshold of 70% assignment of songs from a recording to a single individual was  
276 applied separately to each individual singing on each recording. Likewise, the  
277 playback stimulus was typically also on recordings and observers recognised the  
278 playback on the recording and ensured they did not extract features from it.  
279

### 280 *Canonical discriminant analysis*

281 In order to identify the singers responding to playback experiments and to extract  
282 song frequency values for analyses, we needed to identify them even when we could  
283 not see their colour ring combinations (if ringed). To do this we classified songs from  
284 recordings to individuals. The identity of the singer in 168 cases out of 230 identified  
285 on recordings had been determined in previous studies (Kirschel et al., 2011; Kirschel  
286 et al., 2009b) or by sight or with radio telemetry in 2012. However, there remained 39  
287 recordings of antthrush songs for which we still needed to identify the singer. There  
288 are numerous ways to classify songs to individuals, which can include supervised and  
289 unsupervised methods (Blumstein et al., 2011), and several such methods have been  
290 tested on songs of Mexican antthrush (Kirschel et al., 2009b).

291 We followed (Kirschel et al., 2011) in using linear canonical discriminant analysis  
292 (CDA) to identify songs to individuals. The CDA was performed in STATA 11.2  
293 (StataCorp 2009) on songs cut from recordings obtained in May 2012 using the 19  
294 variables extracted from the songs. Following (Kirschel et al., 2011), we used 1 189  
295 songs from recordings where the singer could be unambiguously confirmed by sight  
296 or radio telemetry as training data and predicted the singer of 619 songs on the  
297 remaining 39 recordings.

298           We then calculated the percentage correct classification based on the number  
299 of songs from a recording classified to the same individual and compared the  
300 classification with expectations based on the location of the recording. If the  
301 individual identified as the singer was one of the focal pair or an individual from a  
302 nearby territory, we assumed that the individual on the recording was correctly  
303 identified if at least 70% of the songs were assigned to that individual, in accordance  
304 with Kirschel et al. (2011). Following the CDA classification, we filtered out the  
305 recordings with less than 70% assignment to one identified individual except for any  
306 recordings where either the individual was identified in the field either by sight or  
307 using radio telemetry (corresponding author et al. unpubl. ms).

308           The resultant songs classified to individual were then pooled with the 2011  
309 songs from 168 individuals on recordings previously classified (Kirschel et al., 2011;  
310 Kirschel et al., 2009b), and statistical analyses were performed on a total of 3022  
311 songs attributed to 24 individuals. Moreover, we tested whether with the combined  
312 dataset of 50 individuals we could distinguish between male and female song in a  
313 CDA with leave-one-out-classification using the mean values of the 19 song features  
314 from the entire set of recordings included in the study.

315

### 316 *Statistical analyses*

317 To determine whether there was a relationship between body mass and song  
318 frequency we first calculated the mean peak frequency from all recordings of each  
319 individual for each field season. Peak (or dominant) frequency has been shown to be  
320 strongly negatively correlated with body size in the closely related suboscine  
321 passerine group, the woodcreepers (Torres et al., 2017). For this analysis, we  
322 calculated the mean peak frequency only from recordings where the bird's ring

323 combination was identified, or where the bird was identified using radio telemetry  
324 (Corresponding author et al. unpublished ms). Body mass varies between seasons,  
325 especially in females. We controlled for seasonal variation by using values per season  
326 for each individual in analyses (and mean values per season if recaptured). We then  
327 ran a GLMM in lme4 in R, fitted with a Gaussian distribution, with mean peak  
328 frequency as the dependent variable and body mass (g) and sex as fixed effects and  
329 individual included as a random effect, to account for individuals recorded (and body  
330 mass measured) over several years.

331 We then tested whether one of the sexes sings more than the other in response  
332 to playback of either sex using a chi-squared test. We restricted this analysis to 167  
333 experiments (83 male and 84 female song playbacks) to 32 territorial individuals in  
334 pairs where both members of the pair were ringed. To test for what determines when  
335 each sex sings, we used Generalized Linear Mixed Models (GLMM) built in  
336 ‘glmmTMB’ in R, fitted with the binomial distribution and logit link function. We  
337 determined the effect on the binary response variable “female song response” or  
338 “male song response” of the difference in peak frequency between the mean peak  
339 frequency of the responder’s song (from all recordings of the individual obtained that  
340 year) and the peak frequency of the playback stimulus (hereafter frequency  
341 differential). We log-transformed all frequencies because doing so best approaches  
342 the scale with which animals perceive and modulate their frequencies (Cardoso,  
343 2013). We also tested for an effect of the difference in body mass between subject  
344 and playback singer (hereafter body mass differential) and the latter’s sex affected  
345 male or female response levels. Body mass was also log-transformed, because log-  
346 size is linearly related to log frequency (Torres et al., 2017). We included in the  
347 model the binary predictor of sex of the individual whose song was used in the

348 playback experiment, and its interaction with frequency and body mass differentials.

349 Responses to song playback might also be affected by the season, the time of  
350 day, and whether the bird had previously been captured in a mist net in response to  
351 playback. We thus included season, capture history and session as fixed factors in the  
352 model. Capture history was defined as a categorical factor with the following  
353 categories: 1) never caught before; 2) last caught in a previous field season (i.e. over  
354 five months earlier); 3) caught in current field season. Because responses could also  
355 vary by individual subject's propensity to sing in response to playback, or because of  
356 other features of a specific stimulus used, we included subject of experiment and  
357 playback stimulus used as crossed random factors in the models. While we controlled  
358 for session in our models, we also tested whether there was any bias towards playing  
359 more playbacks of a certain sex at a time when subjects were more or less likely to  
360 respond by performing a chi-squared test.

361 Using the subset of 36 experiments performed with a standardised  
362 methodology in May 2012, we tested using GLMMs in 'lme4' in R specific questions  
363 on how frequency and body mass differentials may explain when males and females  
364 responded to playback. Specifically, we tested whether frequency (or body mass)  
365 differential varied between the male/female playback experiments that subjects (of  
366 each sex) did and did not respond to (with territory as a random factor).

367 We used the DHARMA package in R to check the residual diagnostics of our  
368 models, inspecting the QQ plot and confirming there was no significant deviation  
369 evident from the Kolmogorov-Smirnov test.

370

## 371 **Results**

### 372 *Genetic sex identification*

373 Of the 21 birds we obtained samples from in 2012, 13 were male and 8 were female.  
374 This information was combined with the data from previous genetic analyses  
375 (Kirschel et al., 2011), from which 12 sexed males and 11 females, were included as  
376 playback stimuli singers (13 male, 11 female) and/or test subjects (22 male, 17  
377 female) in playback experiments (i.e. the 39 birds included in experiments whether  
378 they responded with song or not).

379

### 380 *Canonical discriminant analysis*

381 Based on the CDA trained using songs of 20 individuals, 619 songs from 39  
382 recordings were classified. Of these, 88.7% were assigned to the predicted individual,  
383 consistent with classification rates found previously for similar numbers of  
384 individuals in a season (Kirschel et al., 2011). By contrast, the CDA could only  
385 classify 75.1% of male song and 55.9% of female song to the correct sex (See Table  
386 S2 for CDA coefficients and canonical structure).

387

### 388 *Patterns of variation in body size and song frequency*

389 While there was no difference in (log) peak frequency according to sex (Table 2, see  
390 also Table 1) there was a significant negative relationship between body mass and  
391 peak frequency, meaning larger individuals sang lower frequency songs (Fig. 1),  
392 though there was no effect of season, nor an interaction effect of sex and body mass  
393 on song frequency.

394

395 Table 1: Mean ( $\bar{X}$ ) and standard deviation (SD) of peak frequency of male and female  
396 songs used in playback experiments and of the songs of individuals responding to  
397 them per field season.



|                  | Playback $X \pm SD$ | Response $X \pm SD$ |
|------------------|---------------------|---------------------|
| Male song (Hz)   | 2021.25 $\pm$ 52.43 | 2018.16 $\pm$ 43.62 |
| Female song (Hz) | 2021.7 $\pm$ 64.66  | 2017.77 $\pm$ 66.01 |

398

399 Table 2: GLMM with Gaussian distribution testing for the effect of mass, sex, and  
400 their interaction, as well as season, on peak frequency (log), with individual as a  
401 random factor.

| <b>N = 50, individuals = 40</b> | <b>Estimate</b> | <b>SE</b> | <b>t</b> | <b>P</b>          |
|---------------------------------|-----------------|-----------|----------|-------------------|
| Intercept                       | 3.75            | 0.14      | 27.70    | <b>&lt;0.0001</b> |
| Sex                             | 0.07            | 0.23      | 0.31     | 0.76              |
| Body mass (log)                 | -0.25           | 0.08      | -3.26    | <b>0.002</b>      |
| Season                          | -0.001          | 0.002     | -0.63    | 0.54              |
| Sex/body mass interaction       | -0.04           | 0.14      | -0.29    | 0.77              |

402

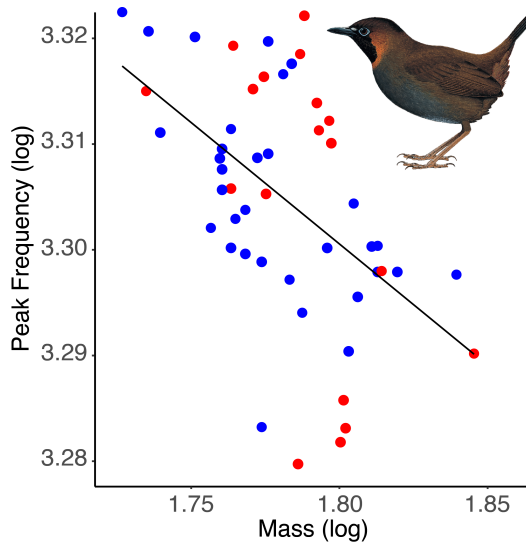

403

404

405 **Figure 1**

406 Relationship between (log) body mass and (log) peak frequency in males (blue dots)

407 and females (red dots). *Formicarius moniliger* illustration courtesy of (Krabbe &

408 Schulenberg, 2020).

409

410 *Playback experiments*

411 Males responded significantly differently to females, responding more with song to  
412 both male (88.2% vs 11.8% of experiments;  $\chi^2 = 5.34$ ,  $P = 0.02$ ) and female playback  
413 (88.0% vs 27.7% of experiments;  $\chi^2 = 15.52$ ,  $P < 0.0001$ ). Males showed no  
414 difference in their likelihood to sing based on sex of playback, frequency or body  
415 mass differentials or their interactions with sex (Table 3, Fig. 2). By contrast, females  
416 were more likely to respond with song to female playback than male playback, but not  
417 in relation to frequency or body mass differentials (Table 3). There was, however, a  
418 significant negative interaction between sex of playback and frequency differential,  
419 indicating that females increasingly respond to male song the lower their own song  
420 was in frequency compared to the male playback stimulus (Fig. 2). There was no  
421 interaction effect of sex with body mass differential though, and no effect of season or  
422 capture history on responses either (Table 3), but females were less likely to respond  
423 in the middle and afternoon sessions. There was, however, no bias regarding which  
424 session male and female playbacks were presented in ( $\chi^2 = 0.48$ ,  $P = 0.79$ ).

425 In the subset of experiments performed systematically in May 2012, we found  
426 that male songs females responded to were significantly lower in frequency compared  
427 to their own song than the male songs they did not respond to were (Fig. 2), but there  
428 was no significant difference found in the other tests of frequency differentials (i.e.,  
429 females or males responding to female song, or males responding to male song)  
430 (Table S3). Further, we found that the males whose songs females responded to were  
431 much lighter in comparison to their own mass than the males they did not respond to  
432 were (Fig. 2). Again, there was no significant pattern in the remaining tests relating to



444 male (h) body mass differentials in experiments they do and do not respond to from  
 445 subset of experiments performed in May 2012. Lower (more negative) frequency  
 446 differentials represent individuals singing in response to higher frequency song than  
 447 their own. Higher (positive) body mass differentials represent individuals responding  
 448 to playback stimulus singers that have lower body mass than they do.

449

450 **Table 3:** Results of GLMMs testing the effect of sex of playback, frequency and  
 451 body mass differential, and the interaction of sex of playback with those differentials  
 452 on vocal responses of (a) females and (b) males.

**a) Female responses (N = 159, subject = 16, playback stimulus = 39)**

|                                                     | Estimate | SE    | Z     | P            |
|-----------------------------------------------------|----------|-------|-------|--------------|
| Intercept                                           | 0.36     | 0.93  | 0.39  | 0.70         |
| Sex of playback                                     | -2.30    | 0.84  | -2.75 | <b>0.006</b> |
| Frequency differential (log)                        | 32.94    | 17.84 | 1.85  | 0.06         |
| Body mass differential (log)                        | 8.17     | 10.44 | 0.78  | 0.43         |
| Season: breeding                                    | -0.36    | 0.75  | -0.48 | 0.63         |
| Last captured: previous season                      | 0.68     | 0.88  | 0.78  | 0.43         |
| Last captured: current season                       | 0.003    | 0.73  | 0.004 | 1.00         |
| Session: middle                                     | -1.47    | 0.53  | -2.78 | <b>0.005</b> |
| Session: afternoon                                  | -1.21    | 0.55  | -2.22 | <b>0.03</b>  |
| Sex of playback: frequency differential interaction | -87.34   | 30.35 | -2.88 | <b>0.004</b> |
| Sex of playback: body mass differential interaction | 3.89     | 16.08 | 0.24  | 0.81         |

**b) Male responses (N = 223, subject = 22, playback stimulus = 41)**

|                                                     |        |       |        |             |
|-----------------------------------------------------|--------|-------|--------|-------------|
| Intercept                                           | 3.51   | 1.38  | 2.54   | <b>0.01</b> |
| Sex of playback                                     | -0.005 | 0.59  | -0.009 | 0.99        |
| Frequency differential (log)                        | -9.14  | 29.11 | -0.31  | 0.75        |
| Body mass differential (log)                        | 2.23   | 13.37 | 0.17   | 0.87        |
| Season: breeding                                    | 0.71   | 0.80  | 0.89   | 0.37        |
| Last captured: previous season                      | -2.37  | 1.38  | -1.72  | 0.09        |
| Last captured: current season                       | -2.01  | 1.20  | -1.67  | 0.10        |
| Session: middle                                     | 0.65   | 0.61  | 1.07   | 0.28        |
| Session: afternoon                                  | 0.11   | 0.65  | 0.17   | 0.86        |
| Sex of playback/ frequency differential interaction | -22.23 | 48.34 | -0.46  | 0.65        |

|     |                                                     |       |       |       |      |
|-----|-----------------------------------------------------|-------|-------|-------|------|
|     | Sex of playback /body mass differential interaction | -3.96 | 17.43 | -0.23 | 0.82 |
| 453 |                                                     |       |       |       |      |

## 454 **Discussion**

455 In this study, antthrush females responded with song to playback less often than males  
456 did, supporting the view that males devote more effort to territory defence than  
457 females do. Indeed, males appeared to respond indiscriminately to song, whether  
458 performed by males or females and irrespective of the body size of the presumed  
459 intruder. Such responses suggest either heightened aggression towards intruders of  
460 both sex in males because they pose a similar threat, promiscuous intentions when  
461 females trespass into their territories, or an inability to distinguish song to sex. By  
462 contrast, females responded significantly more often to female song than to male  
463 song, suggesting they do discriminate between the songs of each sex, in spite of the  
464 extent of overlap in song characteristics (Fig. 1), and our failure to reliably classify  
465 songs to sex in a discriminant analysis. Thus, signals that may appear sexually  
466 monomorphic to human observers are still likely to contain information on sex-  
467 specific differences (Price, 2015). Females singing in response to female song is  
468 consistent with both the function of intrasexual territory defence and mate guarding  
469 (Cain & Langmore, 2015; Langmore, 1998; Levin, 1996; Tobias & Seddon, 2009).  
470 Mexican antthrushes are territorial year-round and form long-term pair bonds and we  
471 believe our results here, supported by evidence from radio telemetry and field  
472 observations (corresponding author unpublished ms), suggest females guard their  
473 mates from potential rival females. Yet, on occasion, females responded to male song.  
474 They responded significantly more to male song the lower the frequency their song  
475 was compared to the male song. In other words, they respond to those males they  
476 perceived as singing higher pitched songs than they did.

477 Peak frequency has been shown to be negatively correlated with body size in  
478 birds, both among species (Ryan & Brenowitz, 1985), and within species (Hall et al.,  
479 2013). Here, we tested whether there was a relationship between peak frequency and  
480 body mass in individuals of Mexican antthrush. We found that larger, heavier  
481 antthrushes do indeed sing lower frequency songs than lighter antthrushes, while song  
482 frequency does not differ between the sexes. What this relationship suggests is that  
483 females responding to males singing at higher frequencies are responding to smaller  
484 males. We did not find an overall effect of body size differential on female responses,  
485 though females did sing in response to smaller males than those they did not respond  
486 to in the systematically designed subset of experiments in May 2012. Of course, there  
487 is variation in song frequency in animals that is not explained entirely by body mass  
488 (Fitch, 1999), and the antthrushes responded to what they could hear and not what  
489 they could see. Other aspects of the playback stimulus might provide further  
490 information to the receiver regarding the size of the singer and the threat (or  
491 opportunity) represented. One possibility is that individuals may be able to lower their  
492 frequency as a signal of aggressive intent (e.g. Geberzahn et al., 2010). However, the  
493 consistency of spectral and temporal features that results in the levels of classification  
494 accuracy achieved for the species, even between years (Kirschel et al., 2011),  
495 suggests song frequency is unlikely to vary according to social context.

496 We acknowledge that our experiments were not standardised for duration  
497 during earlier field seasons when we also did not keep track of experiments with no  
498 response at all, although our standardised experiments performed in May 2012  
499 provided consistent results. The 2012 experimental subset demonstrated both a greater  
500 frequency, and a greater body mass, differential between subject and singer in the  
501 male playback experiments females responded to than those they did not respond to,

502 providing further indirect as well as direct support that females responded to smaller  
503 males. Might females be attracted to males that are smaller than them? Or could  
504 responses to smaller males just be an indirect consequence of a preference for higher  
505 frequency song (see Cardoso, 2012)? We suggest an alternative explanation. These  
506 paired females are not responding to male song for mutual attraction purposes.  
507 Instead, we believe that females will participate in intersexual territory defence by  
508 singing back only when they perceive the intruding male to be smaller, and thus  
509 weaker, than they are. Sexually monomorphic songs are expected to fulfil a similar  
510 function between the sexes (Riebel et al., 2019), and thus could be used for both  
511 intrasexual and intersexual territory defence. But in a species where the female sings a  
512 fraction of what the male does, it seems she chooses carefully when she will use her  
513 song for the purpose of intersexual territory defence. Indeed, females did not  
514 discriminate between the frequencies of female songs, which coupled with their  
515 significantly higher likelihood to respond to female than male song suggests they see  
516 females as more of a threat to their territory than males. But the cost of intersexual  
517 territory defence could be especially high against larger males (Logue & Gammon,  
518 2004), so they respond only to those males they believe they have a physical  
519 advantage over.

520 We did not test whether female song was influenced by the male mate's  
521 response and thus formed a coordinated territorial response to intruders (e.g., (Hall &  
522 Peters, 2008)– males responded to almost every experiment rendering such a test  
523 unworkable. Such coordinated territorial responses are typically found in birds that  
524 arrange their songs into duets, which antthrushes do not do. Although we have not  
525 tested for it here, our observations suggest that female antthrushes do not sing in  
526 tandem with the male or jam his song as a mate guarding strategy, as found in

527 duetting *Hypocnemis* antbirds (Tobias & Seddon, 2009). Instead, females sometimes  
528 sing solo (see also Kirschel et al., 2011). We also caution that our results are based on  
529 a large number of recordings of individuals identified based on song classifiers, and  
530 that we excluded songs on recordings that we were unable to classify to specific  
531 ringed individuals. Such songs might even have belonged to female or male partners  
532 of the individuals that we did identify singing on recordings, but they were not  
533 included in analyses if the CDA failed to identify them. Nevertheless, any situations  
534 where we were unable to identify the individual singer reduced our sample size and  
535 overall statistical power. We have no reason to assume any missing data would not be  
536 representative of the patterns reported here. We also caution that nonvocal responses  
537 may play an important part in both territorial defence and mate guarding, so it would  
538 be important to associate nonvocal responses such as approaches to playback stimuli  
539 as well as vocal responses.

540         Many previous studies on female song in Neotropical suboscines have shown  
541 it to be dimorphic from the male song and are typically coordinated into duets (e.g.  
542 Bard et al., 2002; Fedy & Stutchbury, 2005; Roper, 2005; Seddon & Tobias, 2006)  
543 consistent with divergent functions between the sexes. We have shown here that  
544 female antthrush songs cannot reliably be distinguished from male song by human  
545 observers and classifiers. We do not suggest, however that the similarity of female  
546 song with male song is evidence for convergence in sex roles. Instead, we suggest our  
547 study on suboscine passerines is consistent with the premise that female song is  
548 ancestral in songbirds (Odom et al., 2014; Riebel et al., 2019) with females singing to  
549 defend territories much in the way that males do. Nevertheless, we find that females  
550 respond to song playback far less than males do and pick and choose when they will  
551 respond with song to presumed intruders, especially when they are males.



552

553

554 **References**

- 555 Badyaev, A. V. (1997). Covariation between life history and sexually selected  
556 traits: an example with cardueline finches. *Oikos*, *80*(1), 128-138. doi: Doi  
557 10.2307/3546524
- 558 Bard, S. C., Hau, M., Wikelski, M., & Wingfield, J. C. (2002). Vocal distinctiveness  
559 and response to conspecific playback in the Spotted Antbird, a  
560 Neotropical suboscine. *Condor*, *104*(2), 387-394. doi: Doi 10.1650/0010-  
561 5422(2002)104[0387:Vdartc]2.0.Co;2
- 562 Blumstein, D. T., Mennill, D. J., Clemins, P., Girod, L., Yao, K., Patricelli, G., . . .  
563 Kirschel, A. N. G. (2011). Acoustic monitoring in terrestrial environments  
564 using microphone arrays: applications, technological considerations and  
565 prospectus. *Journal of Applied Ecology*, *48*(3), 758-767. doi:  
566 10.1111/j.1365-2664.2011.01993.x
- 567 Bostwick, K. S., & Prum, R. O. (2005). Courting bird sings with stridulating wing  
568 feathers. *Science*, *309*(5735), 736-736. doi: 10.1126/science.1111701
- 569 Cain, K. E., & Langmore, N. E. (2015). Female and male song rates across  
570 breeding stage: testing for sexual and nonsexual functions of female song.  
571 *Animal Behaviour*, *109*, 65-71. doi: 10.1016/j.anbehav.2015.07.034
- 572 Cardoso, G. C. (2012). Paradoxical calls: the opposite signaling role of sound  
573 frequency across bird species. *Behavioral Ecology*, *23*(2), 237-241. doi:  
574 10.1093/beheco/arr200
- 575 Cardoso, G. C. (2013). Using frequency ratios to study vocal communication.  
576 *Animal Behaviour*, *85*(6), 1529-1532. doi: 10.1016/j.anbehav.2013.03.044
- 577 Clark, C. J., Kirschel, A. N. G., Hadjioannou, L., & Prum, R. O. (2016). Smithornis  
578 broadbills produce loud wing song by aeroelastic flutter of medial  
579 primary wing feathers. *Journal of Experimental Biology*, *219*(7), 1069-  
580 1075. doi: 10.1242/jeb.131664
- 581 Cody, M. L. (2000). Antbird guilds in the lowland Caribbean rainforest of  
582 southeast Nicaragua. *Condor*, *102*(4), 784-794. doi: Doi 10.1650/0010-  
583 5422(2000)102[0784:Agitlc]2.0.Co;2
- 584 Collier, T. C., Kirschel, A. N. G., & Taylor, C. E. (2010). Acoustic localization of  
585 antbirds in a Mexican rainforest using a wireless sensor network. *Journal*  
586 *of the Acoustical Society of America*, *128*(1), 182-189. doi:  
587 10.1121/1.3425729
- 588 de Kort, S. R., & ten Cate, C. (2001). Response to interspecific vocalizations is  
589 affected by degree of phylogenetic relatedness in *Streptopelia* doves.  
590 *Animal Behaviour*, *61*(1), 239-247. doi: 10.1006/anbe.2000.1552
- 591 Fair, J., Paul, E., & Jones, J. (2010). *Guidelines to the use of wild birds in research*.  
592 Washington, D.C.: Ornithological Council.
- 593 Fedy, B. C., & Stutchbury, B. J. M. (2005). Territory defence in tropical birds: are  
594 females as aggressive as males? *Behavioral Ecology and Sociobiology*,  
595 *58*(4), 414-422. doi: 10.1007/s00265-005-0928-4

- 596 Fitch, W. T. (1999). Acoustic exaggeration of size in birds via tracheal elongation:  
597 comparative and theoretical analyses. *Journal of Zoology*, 248(1), 31-48.  
598 doi: 10.1111/j.1469-7998.1999.tb01020.x
- 599 Fridolfsson, A. K., & Ellegren, H. (1999). A simple and universal method for  
600 molecular sexing of non-ratite birds. *Journal of Avian Biology*, 30(1), 116-  
601 121. doi: Doi 10.2307/3677252
- 602 Gahr, M. (2000). Neural song control system of hummingbirds: Comparison to  
603 swifts, vocal learning (songbirds) and nonlearning (suboscines)  
604 passerines, and vocal learning (budgerigars) and nonlearning (dove, owl,  
605 gull, quail, chicken) nonpasserines. *Journal of Comparative Neurology*,  
606 426(2), 182-196.
- 607 Geberzahn, N., Goymann, W., Muck, C., & ten Cate, C. (2009). Females alter their  
608 song when challenged in a sex-role reversed bird species. *Behavioral*  
609 *Ecology and Sociobiology*, 64(2), 193-204. doi: 10.1007/s00265-009-  
610 0836-0
- 611 Geberzahn, N., Goymann, W., & ten Cate, C. (2010). Threat signaling in female  
612 song-evidence from playbacks in a sex-role reversed bird species.  
613 *Behavioral Ecology*, 21(6), 1147-1155. doi: 10.1093/beheco/arq122
- 614 Goymann, W., Wittenzellner, A., & Wingfield, J. C. (2004). Competing Females and  
615 Caring Males. Polyandry and Sex-Role Reversal in African Black Coucals,  
616 *Centropus grillii*. *Ethology*, 110(10), 807-823. doi: 10.1111/j.1439-  
617 0310.2004.01015.x
- 618 Hall, M. L. (2004). A review of hypotheses for the functions of avian duetting.  
619 *Behavioral Ecology and Sociobiology*, 55(5), 415-430. doi:  
620 10.1007/s00265-003-0741-x
- 621 Hall, M. L., Kingma, S. A., & Peters, A. (2013). Male Songbird Indicates Body Size  
622 with Low-Pitched Advertising Songs. *PLoS ONE*, 8(2). doi:  
623 10.1371/journal.pone.0056717
- 624 Hall, M. L., & Peters, A. (2008). Coordination between the sexes for territorial  
625 defence in a duetting fairy-wren. *Animal Behaviour*, 76(1), 65-73. doi:  
626 10.1016/j.anbehav.2008.01.010
- 627 Hau, M., Wikelski, M., Soma, K. K., & Wingfield, J. C. (2000). Testosterone and  
628 year-round territorial aggression in a tropical bird. *General and*  
629 *Comparative Endocrinology*, 117(1), 20-33. doi: Doi  
630 10.1006/Gcen.1999.7390
- 631 Kirschel, A. N. G., Blumstein, D. T., & Smith, T. B. (2009a). Character displacement  
632 of song and morphology in African tinkerbirds. *Proceedings of the*  
633 *National Academy of Sciences of the United States of America*, 106(20),  
634 8256-8261.
- 635 Kirschel, A. N. G., Cody, M. L., Harlow, Z. T., Promponas, V. J., Vallejo, E. E., &  
636 Taylor, C. E. (2011). Territorial dynamics of Mexican Ant-thrushes  
637 *Formicarius moniliger* revealed by individual recognition of their songs.  
638 *Ibis*, 153(2), 255-268.
- 639 Kirschel, A. N. G., Earl, D. A., Yao, Y., Escobar, I. A., Vilches, E., Vallejo, E. E., &  
640 Taylor, C. E. (2009b). Using Songs to Identify Individual Mexican  
641 Antthrush *Formicarius Moniliger*: Comparison of Four Classification  
642 Methods. *Bioacoustics-the International Journal of Animal Sound and Its*  
643 *Recording*, 19(1-2), 1-20.

- 644 Kirschel, A. N. G., Seddon, N., & Tobias, J. A. (2019). Range-wide spatial mapping  
645 reveals convergent character displacement of bird song. *Proceedings of*  
646 *the Royal Society B-Biological Sciences*, 286(1902). doi: ARTN 20190443  
647 10.1098/rspb.2019.0443
- 648 Kokko, H., & Jennions, M. D. (2008). Parental investment, sexual selection and sex  
649 ratios. *Journal of Evolutionary Biology*, 21(4), 919-948. doi:  
650 10.1111/j.1420-9101.2008.01540.x
- 651 Krabbe, N. K., & Schulenberg, T. S. (2020). Mayan Antthrush. In J. del Hoyo, A.  
652 Elliot, J. Sargatal, D. A. Christie & E. de Juana (Eds.), *Handbook of the Birds*  
653 *of the World Alive*. Barcelona: Lynx Edicions.
- 654 Lande, R. (1980). Sexual Dimorphism, Sexual Selection, and Adaptation in  
655 Polygenic Characters. *Evolution*, 34(2), 292-305. doi: Doi  
656 10.2307/2407393
- 657 Langmore, N. E. (1998). Functions of duet and solo songs of female birds. *Trends*  
658 *in Ecology & Evolution*, 13(4), 136-140. doi: 10.1016/s0169-  
659 5347(97)01241-x
- 660 Levin, R. N. (1985). The Function of Vocal Duetting in the Bay Wren  
661 (Thryothorus-Nigricapillus). *American Zoologist*, 25(4), A3-A3.
- 662 Levin, R. N. (1996). Song behaviour and reproductive strategies in a duetting  
663 wren, Thryothorus nigricapillus: II. Playback experiments. *Animal*  
664 *Behaviour*, 52(6), 1107-1117. doi: 10.1006/anbe.1996.0258
- 665 Logue, D. M., & Gammon, D. E. (2004). Duet song and sex roles during territory  
666 defence in a tropical bird, the black-bellied wren, Thryothorus  
667 fasciatoventris. *Animal Behaviour*, 68(4), 721-731. doi:  
668 10.1016/j.anbehav.2003.10.026
- 669 Lovell, S. F., & Lein, M. R. (2004). Neighbor-stranger discrimination by song in a  
670 suboscine bird, the alder flycatcher, Empidonax alnorum. *Behavioral*  
671 *Ecology*, 15(5), 799-804. doi: 10.1093/beheco/arh082
- 672 Mennill, D. J., & Vehrencamp, S. L. (2008). Context-Dependent Functions of Avian  
673 Duets Revealed by Microphone-Array Recordings and Multispeaker  
674 Playback. *Current Biology*, 18(17), 1314-1319. doi:  
675 10.1016/j.cub.2008.07.073
- 676 Merilä, J., Sheldon, B. C., & Ellegren, H. (1998). Quantitative Genetics of Sexual  
677 Size Dimorphism in the Collared Flycatcher, Ficedula Albicollis. *Evolution*,  
678 52(3), 870-876. doi: 10.1111/j.1558-5646.1998.tb03711.x
- 679 Odom, K. J., & Benedict, L. (2018). A call to document female bird songs:  
680 Applications for diverse fields. *The Auk*, 135(2), 314-325. doi:  
681 10.1642/auk-17-183.1
- 682 Odom, K. J., Hall, M. L., Riebel, K., Omland, K. E., & Langmore, N. E. (2014). Female  
683 song is widespread and ancestral in songbirds. *Nature Communications*,  
684 5(1). doi: 10.1038/ncomms4379
- 685 ParksWatch. (2003). Park Profile – Mexico, Montes Azules Biosphere Reserve  
686 2004, from [http://www.parkswatch.org/parkprofiles/pdf/mabr\\_eng.pdf](http://www.parkswatch.org/parkprofiles/pdf/mabr_eng.pdf)
- 687 Price, J. J. (2009). Evolution and life-history correlates of female song in the New  
688 World blackbirds. *Behavioral Ecology*, 20(5), 967-977. doi:  
689 10.1093/beheco/arp085
- 690 Price, J. J. (2015). Rethinking our assumptions about the evolution of bird song  
691 and other sexually dimorphic signals. *Frontiers in Ecology and Evolution*,  
692 3. doi: 10.3389/fevo.2015.00040

- 693 Price, J. J., Lanyon, S. M., & Omland, K. E. (2009). Losses of female song with  
694 changes from tropical to temperate breeding in the New World  
695 blackbirds. *Proceedings of the Royal Society B-Biological Sciences*,  
696 276(1664), 1971-1980. doi: 10.1098/rspb.2008.1626
- 697 Price, T. D., & Grant, P. R. (1985). The Evolution of Ontogeny in Darwin Finches -  
698 a Quantitative Genetic Approach. *American Naturalist*, 125(2), 169-188.  
699 doi: Doi 10.1086/284336
- 700 Riebel, K., Odom, K. J., Langmore, N. E., & Hall, M. L. (2019). New insights from  
701 female bird song: towards an integrated approach to studying male and  
702 female communication roles. *Biology Letters*, 15(4). doi:  
703 10.1098/rsbl.2019.0059
- 704 Roper, J. J. (2005). Sexually distinct songs in the duet of the sexually  
705 monomorphic Rufous Hornero. *Journal of Field Ornithology*, 76(3), 234-  
706 236. doi: Doi 10.1648/0273-8570-76.3.234
- 707 Ryan, M. J., & Brenowitz, E. A. (1985). The Role of Body Size, Phylogeny, and  
708 Ambient Noise in the Evolution of Bird Song. *The American Naturalist*,  
709 126(1), 87-100. doi: 10.1086/284398
- 710 Seddon, N., & Tobias, J. A. (2006). Duets defend mates in a suboscine passerine,  
711 the warbling antbird (*Hypocnemis cantator*). *Behavioral Ecology*, 17(1),  
712 73-83. doi: 10.1093/beheco/ari096
- 713 Slater, P. J. B., & Mann, N. I. (2004). Why do the females of many bird species sing  
714 in the tropics? *Journal of Avian Biology*, 35(4), 289-294. doi: Doi  
715 10.1111/J.0908-8857.2004.03392.X
- 716 Székely, T., Lislevand, T., & Figuerola, J. (2007). Sexual size dimorphism in birds.  
717 In D. J. Fairbairn, W. U. Blanckenhorn & T. Székely (Eds.), *Sex, size, and*  
718 *gender roles : evolutionary studies of sexual size dimorphism* (pp. 27-37).  
719 Oxford: Oxford University Press.
- 720 Tobias, J. A., Brawn, J. D., Brumfield, R. T., Derryberry, E. P., Kirschel, A. N. G., &  
721 Seddon, N. (2012a). The importance of neotropical suboscine birds as  
722 study systems in ecology and evolution. *Ornitologia Neotropical*, 23, 259-  
723 272.
- 724 Tobias, J. A., Gamarra-Toledo, V., Garcia-Olaechea, D., Pulgarin, P. C., & Seddon, N.  
725 (2011). Year-round resource defence and the evolution of male and  
726 female song in suboscine birds: social armaments are mutual ornaments.  
727 *Journal of Evolutionary Biology*, 24(10), 2118-2138. doi: 10.1111/j.1420-  
728 9101.2011.02345.x
- 729 Tobias, J. A., Montgomerie, R., & Lyon, B. E. (2012b). The evolution of female  
730 ornaments and weaponry: social selection, sexual selection and ecological  
731 competition. *Philosophical Transactions of the Royal Society B: Biological*  
732 *Sciences*, 367(1600), 2274-2293. doi: 10.1098/rstb.2011.0280
- 733 Tobias, J. A., & Seddon, N. (2009). Signal Jamming Mediates Sexual Conflict in a  
734 Duetting Bird. *Current Biology*, 19(7), 577-582. doi:  
735 10.1016/j.cub.2009.02.036
- 736 Torres, I. M. D., Lopez, L. C. S., & de Araújo, C. B. (2017). Allometric trends reveal  
737 distinct evolutionary trajectories for avian communication. *The Journal of*  
738 *the Acoustical Society of America*, 142(4), 1879-1887. doi:  
739 10.1121/1.5005495
- 740 Trifa, V. M., Kirschel, A. N. G., Taylor, C. E., & Vallejo, E. E. (2008). Automated  
741 species recognition of antbirds in a Mexican rainforest using hidden

- 742           Markov models. *Journal of the Acoustical Society of America*, 123(4), 2424-  
743           2431.
- 744   van Dongen, W. F. D., & Mulder, R. A. (2008). Male and female golden whistlers  
745           respond differently to static and dynamic signals of male intruders.  
746           *Behavioral Ecology*, 19(5), 1025-1033. doi: 10.1093/beheco/arn061
- 747   Wallschläger, D. (1980). Correlation of Song Frequency and Body-Weight in  
748           Passerine Birds. *Experientia*, 36(4), 412-412. doi: Doi  
749           10.1007/Bf01975119  
750
- 751
